# Supplementary material for: Evaluating Fertilizer-Drawn Forward Osmosis Performance in Treating Anaerobic Palm Oil Mill Effluent
Source: MDPI journal article supplement (doi:10.3390/membranes11080566), 2021-07-28
Supplement: s1 [file s1]

# Evaluation of Fertilizer-drawn Forward Osmosis for the Treatment of Anaerobic Palm Oil Mill Effluent Using Commercial Fertilizer as Draw Solution

Ruwaida Abdul Wahid <sup>1</sup>, Wei Lun Ang <sup>1,2\*</sup>, Abdul Wahab Mohammad <sup>1,2</sup>, Daniel James Johnson <sup>3</sup> and Nidal Hilal <sup>3</sup>

<sup>1</sup> Department of Chemical and Process Engineering, Faculty of Engineering and Built Environment, Universiti Kebangsaan Malaysia, 43600 Bangi, Selangor Darul Ehsan, Malaysia

<sup>2</sup> Centre for Sustainable Process Technology (CESPRO), Faculty of Engineering and Built Environment, Universiti Kebangsaan Malaysia, 43600 Bangi, Selangor Darul Ehsan, Malaysia

<sup>3</sup> NYUAD Water Research Center, New York University Abu Dhabi, P.O. Box 129188, Abu Dhabi, United Arab Emirates

\* Correspondence: wl\_ang@ukm.edu.my

## Appendix A

**Table S1.** Experimental design matrix and results of 2<sup>3</sup> FFD.

| Run | Level |   |   | J <sub>w</sub> | J <sub>s</sub> |
|-----|-------|---|---|----------------|----------------|
|     | A     | B | C | LMH            | GMH            |
| 1   | -     | + | + | 6.126          | 1.825          |
| 2   | +     | - | - | 9.132          | 3.372          |
| 3   | -     | + | + | 6.177          | 1.898          |
| 4   | +     | + | - | 9.607          | 3.515          |
| 5   | +     | - | - | 8.714          | 2.933          |
| 6   | +     | - | - | 8.995          | 2.819          |
| 7   | -     | + | - | 6.594          | 2.734          |
| 8   | -     | - | + | 5.965          | 2.05           |
| 9   | +     | - | + | 9.999          | 5.55           |
| 10  | +     | + | - | 8.964          | 2.406          |
| 11  | +     | + | - | 9.465          | 3.342          |
| 12  | +     | - | + | 9.29           | 3.628          |
| 13  | +     | + | + | 9.607          | 4.162          |
| 14  | +     | + | + | 10.218         | 4.246          |
| 15  | +     | - | + | 9.619          | 4.71           |
| 16  | -     | - | - | 6.296          | 2.389          |
| 17  | -     | + | - | 6.279          | 2.387          |
| 18  | -     | - | - | 6.054          | 2.138          |
| 19  | +     | + | + | 10.176         | 4.095          |
| 20  | -     | - | - | 6.011          | 1.987          |
| 21  | -     | - | + | 6.138          | 2.118          |
| 22  | -     | + | + | 6.262          | 1.825          |
| 23  | -     | + | - | 6.267          | 2.158          |
| 24  | -     | - | + | 5.994          | 2.236          |

## Appendix B

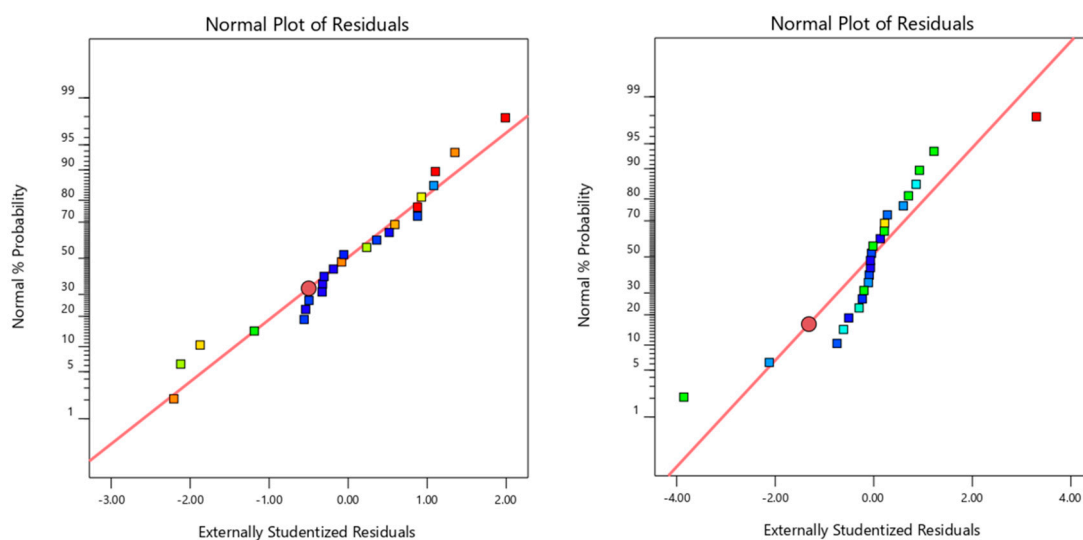

**Figure S1.** Normal probability plot of residuals for: (a) Average water flux,  $J_w$ ; (b) Reverse salt flux,  $J_s$ .

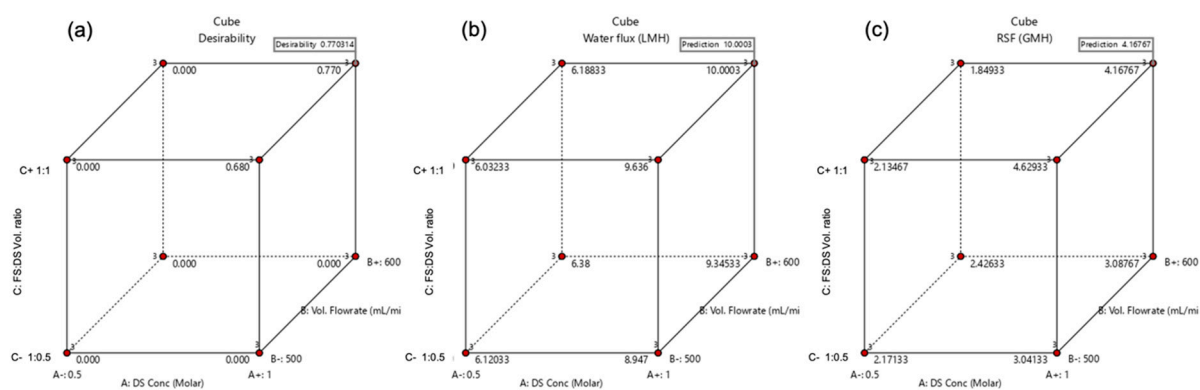

**Figure S2.** Cube plot of optimum conditions for: (a) Desirability (b) Average water flux,  $J_w$ ; (c) Reverse salt flux,  $J_s$ .
